# Supplementary material
Source: publisher figshare collection journal article supplement (https://sage.figshare.com/ndownloader/files/13678448)
Supplement: Supplementary file 1 [file 13678448]

**Supplemental Material S1**

Table S1.

*Descriptions of the studies included in the meta-analysis.*

| Author                                     | Relationship Type          | N targets |
|--------------------------------------------|----------------------------|-----------|
| Carroll (1952)                             | cohabitators               | 110       |
| McEwan & Devins (1983)                     | friends                    | 7-19      |
| Malloy & Albright (1990)                   | cohabitators               | 84        |
| Watson & Clark (1991)                      | other                      | 150       |
| Davidson (1993)                            | friends                    | 92        |
| Mount, Barrick, & Strauss (1994)           | work colleagues            | 92-105    |
| White & Nias (1994)                        | family                     | 110       |
| Botwin, Buss, & Shackelford (1997)         | family, friends, strangers | 105-106   |
| Foltz, Morse, Calvo, & Barber (1997)       | family                     | 98        |
| Gomà-i-Freixanet (1997)                    | family                     | 198       |
| Kosek (1998)                               | family                     | 108       |
| Spirrison & Choi (1998)                    | friends                    | 45        |
| Chambers (1999)                            | family, friends, strangers | 108       |
| Barrick, Patton, & Haugland (2000)         | friends, strangers         | 73        |
| Lanthier (2000)                            | family                     | 240       |
| Watson, Hubbard, & Wiese (2000)            | family, friends            | 148-558   |
| Lang, Lüdtke, & Asendorpf (2001)           | friends                    | 126       |
| O'Connor, Archer, & Wu (2001)              | family                     | 77        |
| Rovner & Casten (2001)                     | family                     | 10-26     |
| Trierweiler, Eid, & Lischetzke (2002)      | friends*                   | 482       |
| Zarevski, Bratko, Butković, & Lazić (2002) | friends                    | 111-225   |
| Collani & Herzberg (2003)                  | friends                    | 127       |
| Hendriks et al. (2003)                     | friends                    | 97        |

|                                                      |                  |         |
|------------------------------------------------------|------------------|---------|
| Kurtz & Sherker (2003)                               | friends          | 216     |
| Lee, Gizzarone, & Ashton (2003)                      | friends          | 150     |
| Saroglou & Fiasse (2003)                             | family           | 122     |
| Besser (2004)                                        | friends          | 187     |
| Biesanz & West (2004)                                | family, friends  | 256     |
| Gomà-i-Freixanet, Wismeijer, & Valero (2005)         | family           | 171     |
| Longley, Watson, & Noyes (2005)                      | family           | 171     |
| Bratko, Chamorro-Premuzic, & Saks (2006)             | friends          | 255     |
| Davis & Mattoon (2006)                               | friends          | 187     |
| Holden, Wasylkiw, Starzyk et al. (2006)              | cohabitators     | 420     |
| Lischetzke & Eid (2006)                              | friends          | 475     |
| Small & Diefendorff (2006)                           | work colleagues  | 143     |
| Watson & Humrichouse (2006)                          | family           | 306-574 |
| Biesanz, West, & Millevoi (2007)                     | friends          | 184     |
| Furr, Dougherty, Marsh, & Mathias (2007)             | family           | 53      |
| Lönnqvist, Paunonen, Tuulio-Henriksson et al. (2007) | family           | 70      |
| Muck, Hell, & Gosling (2007)                         | friends          | 175     |
| Wagerman & Funder (2007)                             | friends          | 10-57   |
| Yeagley, Morling, & Nelson (2007)                    | strangers        | 6       |
| Back, Schmukle, & Egloff (2008)                      | strangers        | 599     |
| Holland & Roisman (2008)                             | friends          | 80-218  |
| Kurtz, Tarquini, & Iobst (2008)                      | family, friends  | 89      |
| Tahmasb, Ghorbani, & Watson (2008)                   | friends          | 288     |
| Vazire, Naumann, Rentfrow, & Gosling (2008)          | family, friends* | 41-160  |
| Borkenau, Zaltauskas, & Leising (2009)               | friends          | 284     |
| Jackson, Bogg, Walton et al. (2009)                  | other            | 74-124  |
| Soto & John (2009)                                   | friends          | 590     |

|                                                |                          |         |
|------------------------------------------------|--------------------------|---------|
| Back, Schmukle, & Egloff (2010)                | strangers                | 72-73   |
| Back, Stopfer, Vazire et al. (2010)            | strangers                | 103     |
| Borkenau, Paelecke, & Yu (2010)                | other                    | 126     |
| Gros, Simms, & Antony (2010)                   | friends                  | 127     |
| Joseph & Newman (2010)                         | friends                  | 280     |
| Kandler, Riemann, Spinath, & Angleitner (2010) | family, friends          | 607     |
| Leising, Erbs, & Fritz (2010)                  | friends                  | 90      |
| Letzring & Nofle (2010)                        | family, friends          | 268     |
| Simms, Zelazny, Yam, & Gros (2010)             | friends                  | 606     |
| Vazire (2010)                                  | friends, strangers       | 165     |
| Voracek, Gabler, Kreutzer et al. (2010)        | friends                  | 48      |
| Bleidorn & Peters (2011)                       | work colleagues          | 44      |
| Carlson, Vazire, & Furr (2011)                 | friends, strangers*      | 68-198  |
| Leising (2011)                                 | strangers                | 108     |
| Marini & Kurtz (2011)                          | family, friends          | 103-128 |
| Miller, Jones, & Lynam (2011)                  | friends                  | 64      |
| Traupman, Smith, Florsheim et al. (2011)       | family                   | 300     |
| Colbert, Judge, Choi, Wang (2012)              | friends                  | 155     |
| Connelly & Hülshager (2012)                    | friends, work colleagues | 97      |
| Connelly & Wollscheid (2012)                   | friends                  | 101     |
| Hong, Koh, & Paunonen (2012)                   | friends                  | 246     |
| Kim & Schimmack (2012)                         | friends                  | 922-947 |
| Koydemir & Schütz (2012)                       | friends                  | 86-101  |
| Kurtz, Puher, & Cross (2012)                   | family, friends          | 106     |
| Nauta (2012)                                   | friends                  | 114     |
| Nestler, Egloff, Küfner, & Back (2012)         | strangers                | 18-40   |
| Beer, Watson, & McDade-Montez (2013)           | family, friends          | 124-381 |

|                                               |                                         |           |
|-----------------------------------------------|-----------------------------------------|-----------|
| Buschor, Proyer, Ruch (2013)                  | friends                                 | 330       |
| Cohen, Panter, Turan et al. (2013)            | friends, work colleagues*               | 320-341   |
| Di Domenico, Quitasol, & Fournier (2013)      | strangers                               | 249       |
| Fleischhauer, Enge, Miller et al. (2013)      | friends                                 | 204       |
| Gallrein, Carlson, Holstein, & Leising (2013) | friends                                 | 65        |
| Hall & Pennington (2013)                      | strangers                               | 100       |
| Klafehn, Li, & Chiu (2013)                    | friends*                                | 206       |
| Leikas, Lönnqvist, Verkasalo, Nissinen (2013) | work colleagues                         | 35        |
| Leising, Borkenau, Zimmermann et al. (2013)   | other                                   | 129       |
| Momm, Blickle, & Liu (2013)                   | work colleagues                         | 123       |
| Orth (2013)                                   | cohabitators                            | 186       |
| Siers & Christiansen (2013)                   | friends                                 | 200       |
| Sorokowska (2013)                             | strangers                               | 50        |
| Webb, Nelson, Huelsman, Bleske-Rechek (2013)  | friends                                 | 198       |
| Clifton (2014)                                | family, friends                         | 52-111    |
| de Vries, Zettler, & Hilbig (2014)            | family, friends                         | 1106      |
| Saeki, Oishi, Maeno, & Gilbert (2014)         | friends                                 | 202       |
| Uziel (2014)                                  | family                                  | 70        |
| Dufner, Egloff, Hausmann et al. (2015)        | friends*                                | 106       |
| Dermody, Wright, Cheong et al. (2016)         | family, friends*                        | 856       |
| Kholin, Meurs, Blickle et al. (2016)          | friends                                 | 116       |
| Solomon & Vazire (2016)                       | friends                                 | 173       |
| Allik data                                    | family                                  | 2679-2733 |
| Ashton data                                   | friends                                 | 2137      |
| Beer data                                     | friends, strangers*                     | 76-107    |
| Eugene-Springfield Community Sample           | family, friends, work colleagues, other | 41-656    |
| DeYoung data                                  | friends                                 | 131       |
| Furr data                                     | family, friends, strangers*             | 13-291    |

|                         |                        |         |
|-------------------------|------------------------|---------|
| Letzring data           | other                  | 56      |
| Page-Gould data         | strangers              | 100-241 |
| Petrican & Schimmack    | friends                | 214     |
| Powell data             | friends                | 254     |
| Schimmack data          | family                 | 404-410 |
| Vazire data             | family, friends*       | 13-217  |
| Walker & Schimmack data | friends                | 127-310 |
| Zou & Schimmack data    | family, friends, other | 131-191 |

---

Note. \*Informants can include other types of acquaintances.

Table S2.

*Hough and Ones' (2001) Big Five taxonomy with example inventories.*

|                         |                                                                                    |
|-------------------------|------------------------------------------------------------------------------------|
| Emotional Stability     | Big Five Inventory: Neuroticism                                                    |
| Anxiety                 | PANAS-X: Fear                                                                      |
| Uneven-temperedness     | NEO-PI-R: Anger                                                                    |
| Skepticism              | NEO-3: Angry Hostility                                                             |
| Depression              | Guilt and Shame Proneness scale: Shame Proneness                                   |
| Self-Esteem             | Rosenberg's Self-Esteem Scale                                                      |
| Negative Affect         | Temperament and Emotion Questionnaire: Negative Affect                             |
| Extraversion            | HEXACO: Extraversion                                                               |
| Sensation Seeking       | NEO-3: Excitement Seeking                                                          |
| Sociability             | Self-Directed Search: Social Introversion (Holland, Fritzsche, & Powell, 1997)     |
| Positive Emotions       | Positive and Negative Affect Scales: Positive Affect                               |
| Dominance               | Interpersonal Adjective Scale: Assured-Dominant                                    |
| Activity                | Zuckerman-Kuhlman Personality Questionnaire: Activity                              |
| Openness/Intellect      | Trait Adjectives Extracted from Saucier and Ostendorf (1999; Table 2)              |
| Curiosity               | Big Five Inventory: Aesthetics                                                     |
| Depth                   | NEO-3: Fantasy                                                                     |
| Aesthetics              | Values in Action Inventory of Strengths: Beauty                                    |
| Openness to Sensations  | Bipolar Adjective Rating Scale: Novelty/Openness (Johnson, 2000)                   |
| Intellectual Efficiency | One item selected from Norman's (1963) five higher order factors: Intellectual     |
| Nontraditionalism       | Supernumerary personality Inventory: Conventionality (Paunonen, 2002)              |
| Agreeableness           | Mini markers: Agreeableness                                                        |
| Nurturance              | Interpersonal Adjectives Scale Revised: Cold-Hearted                               |
| Non-manipulative        | One item measure: Is an honest soul (Gallrein, Carlson, Holstein, & Leising, 2013) |
| Cooperation             | Big Five Inventory: Compliance                                                     |

| Modesty           | Values in Action Inventory of Strengths: Modesty                                            |
|-------------------|---------------------------------------------------------------------------------------------|
| Conscientiousness | NEO-FFI: Conscientiousness                                                                  |
| Achievement       | Conscientiousness Adjective Checklist: Industriousness (Roberts, O'Donnell, & Robins, 2004) |
| Cautiousness      | Self-Directed Search: Deliberation (Holland et al., 1997)                                   |
| Dependability     | Big Five Inventory: Self-Discipline                                                         |
| Orderliness       | Behavioral Indicators of Conscientiousness : Orderliness (Jackson et al. 2010)              |

Note. The current taxonomy is based on Hough and Ones' (2011) original taxonomy that has been used in many meta-analytic reviews to categorize a breadth of personality scales as measures of particular Big Five factors, facets, or interstitial/compound traits (e.g., Dudley, Orvis, Lebiecki, & Cortina, 2006; Foldes, Duehr, & Ones, 2008; Trapmann, Hell, Hirn, & Schuler, 2007). For example, the NEO-PI-R Extraversion domain is classified to *Global Extraversion* taxon, whereas the NEO-PI-R Gregariousness facet is classified to *Extraversion: Sociability* taxon. The present meta-analysis used existing and emerging large-scale multi-inventory research to more cleanly distinguish facet traits and to delineate them from compound/interstitial traits.

## Supplemental Material S2

### Collection method

The current meta-analysis used a range of different methods to collect the data. First, we reviewed 431 articles compiled in Connelly and Ones' (2010) meta-analytic database of informant inter-rater reliabilities, self-informant correlations, and informant correlations with behaviors. Second, we updated this database by searching in *PsycInfo* to locate articles that had been published since 2008. In this *PsycInfo* search, we used the following search string: *(personality or trait or temperament) and (peer or informant or spouse or friend or roommate or stranger or consensual validity or consensual validation or self-informant agreement or zero acquaintance or thin slices of behavior)*. The search results were assessed by the second author for eligibility by scanning the titles and abstracts. The detailed search produced 297 articles for potential review. Third, we reviewed the reference sections of additional meta-analyses of informant-report studies (Kenny, Albright, Malloy, & Kashy, 1994; Oh, Wang, & Mount, 2011). Fourth, we examined psychological test manuals for potential comparisons between self- and informant-report forms (including the California Personality Inventory (3rd Edition), HEXACO Manual, HPI Manual, JPI Jackson Personality Inventory manual, OPQ32 Technical Manual, and NEO Inventories – NEO-PI-3, NEO-FFI-3, and NEO-PI-R). Fifth, we reviewed the abstracts of relevant conference programs since 2008 (Association for Research in Personality, European Association of Personality Psychology, International Society for the Study of Individual Differences, and Society for Personality and Social Psychology). Sixth, we contacted 33 researchers who have frequently published work using self and informants to request unpublished data. Lastly, we posted a call for working papers, forthcoming articles, and unpublished data on relevant list serves and associations' websites (the Society for Personality



and Social Psychology, Association for Research in Personality, Society of Australasian Social Psychologists, Canadian Psychological Association, Society for the Psychological Study for Social Issues, and the Society for Industrial and Organizational Psychology).

In many cases, the articles and manuscripts we obtained did not report specific statistics of interest (i.e., means and standard deviations) but appeared to have collected self- and informant-report data. In such cases, we requested further information from the corresponding authors of any articles published since 2000.

### **Inclusion and exclusion criteria**

There were six inclusion/exclusion criteria to select the studies for the meta-analysis. First, the study must have collected personality reports from both self and an informant source using the same scale and reported their means, standard deviations, and sample size. For example, studies in which the self completed a personality inventory on likert-type scale and informant(s) completed the same inventory on adjective-anchored rating scale were excluded. Second, raters must be rating the same targets. We excluded studies that asked half of the sample to rate themselves and the other half to rate someone they know well as these two reports are not paired and their discrepancy scores reflect assumed similarity (lack objective criteria). Third, we included only articles reporting data on “normal” range personality traits (i.e., scales designed to measure psychopathology were excluded). This facilitated our focus on normal personality traits that tend to be normally distributed in the general populations, and align with the Big Five personality studies. Fourth, we excluded traumatized or heavy clinical samples to avoid populations whose self- or informant-perspectives may be particularly distorted. Fifth, we also excluded studies using ipsative measures and/or peer-nomination procedures in which a group of raters (e.g., a fraternity) nominated the group member who scored highest or lowest on a

particular trait. These measures entail psychometric problems caused by an artificial dependence among the scales (e.g., resulting in inflation of reliability coefficients). Lastly, we only included studies that provided the overall sample sizes, means, standard deviations of the self and informant source to correct for unreliability. If a sample was used in more than one article, we coded it once to ensure independence of effect sizes.

### **Database Coding**

**Personality Variables.** First, we coded the inventory according to the working taxonomy of Big Five factors and facets. All authors coded all personality scales according to this taxonomy, classifying scales both within a particular Big Five domain and as a global measure or particular facet/compound trait. Inter-rater reliabilities between the coders were strong, with Kappa  $\kappa=.914$  and  $\kappa=.892$  (Fleiss, 1971; Geertzen, 2012). In cases of disagreements between three authors, final categorization was determined by discussion between all three coders until agreement was reached.

**Study Characteristics.** In addition to the personality measure, we identified characteristics of the sample and type of relationship that informants had with the target. To assess inter-rater reliability in the coding, two raters coded a subset of studies (10% of studies reviewed). If the studies did not report the necessary information, we contacted the corresponding author for additional information.

We conducted inter-rater reliability assessments for key data elements using coefficient Kappa  $\kappa$  (Cohen, 1960) for categorical variables and intraclass correlation (ICC) for numerical variables (to examine the agreement between the two judges). Inter-rater agreement was good for Big Five classification ( $\kappa=1$ ), and informant type ( $\kappa=.80$ ), and for continuous variables ranging

from .9 to 1 (e.g., means and standard deviations). Any discrepancies between raters were resolved through discussion.

**Formula.** Formula to correct for number of raters for averaged scores and summed scores of the standard deviation and reliability scores.  $S_x^2$  = variance of a single rater,  $k$  = number of raters per target,  $S_{\bar{x}}^2$  = variance of the average across  $k$  raters, and  $r_{xx}$  = interrater reliability of a single rater.

For averaged scores: 
$$\sigma_x^2 = \frac{k\sigma_{\bar{x}}^2}{1 + r_{xx}(k - 1)}$$

For summed scores: 
$$\sigma_x^2 = \frac{\sigma_{\Sigma x}^2}{k[r_{xx}(k - 1) + 1]}$$

Standard deviations of self- and informant-reports were disattenuated before they were put into the two formulas of interest if any of the estimates were based on more than one rater. To correct for the bias, we used inter-rater reliability scores reported in the article. If the study reported reliability scores for multiple raters, reliability scores were attenuated for number of raters ( $r_{xx} = ((1/k) * \bar{r}) / (1 + ((1/k) - 1) * \bar{r})$ ;  $\bar{r}$  = interrater reliability of multiple raters). If interrater reliability were not available in the article, we used the interrater reliability estimates reported in Connelly's (2008) dissertation.

**Winsorizing.** In a meta-analytic review, the results of extremely larger studies can disproportionately affect the results. Thus, we winsorized the three large sample size studies to prevent contributions of larger studies affecting the results. There were three outlying studies that

were winsorized to 2.5 SDs ( $N = 1,006$ ) from the mean of all sample sizes. Identical moderator analyses were conducted without changing sample sizes of the three studies and produced similar results.

## Results

**Publication Bias.** Publication bias was calculated using the Egger's test (Egger, Smith, Schneider, & Minder, 1997) and Begg-Mazumdar test (Begg & Mazumdar, 1994) to detect detecting asymmetry in the funnel plots. All analyses were carried out in the R environment for statistical computing and visualization. Roughly symmetric funnel plots would suggest low risk of publication bias. Results suggest no evidence of publication bias. The null hypothesis for Egger's test is that symmetry is present with the alternative hypothesis indicating that asymmetry is present. All  $p$ -values were above .05. Thus, there was no evidence to reject the null hypothesis in favor of the alternative suggesting that there was no publications bias in the studies included in the meta-analysis. The Begg-Mazumdar test confirmed these observations with non-significant results. This method is used to calculate a rank-correlation between effect size and its corresponding standard error. A significant and strong correlation indicates presence of publication bias (e.g., larger effects are disproportionately represented in smaller sample studies), and all Begg-Mazumdar indicators gave Kendall's tau values close to zero suggesting no publication bias.

Table S3.  
*Publication test results.*

|                     | Egger's regression test |          | Begg-Mazumdar correlation test |          |
|---------------------|-------------------------|----------|--------------------------------|----------|
|                     | <i>z</i>                | <i>p</i> | Kendall's $\tau$               | <i>p</i> |
| Emotional Stability | -.450                   | .653     | -.003                          | .950     |
| Extraversion        | -.068                   | .946     | .027                           | .518     |
| Openness/Intellect  | .282                    | .778     | .059                           | .214     |
| Agreeableness       | -.277                   | .782     | -.022                          | .646     |
| Conscientiousness   | -.656                   | .512     | -.057                          | .228     |

**Supplemental Material S3**

Table S4.

*Independent raters' ratings of level of desirability and observability of the traits and facets.*

| <i>Traits</i>          | Desirability <i>M</i> | Desirability <i>SD</i> | Observability <i>M</i> | Observability <i>SD</i> |
|------------------------|-----------------------|------------------------|------------------------|-------------------------|
| Emotional Stability    | 5.68                  | 1.60                   | 3.21                   | 1.23                    |
| Extraversion           | 5.58                  | .84                    | 6.47                   | .51                     |
| Openness to Experience | 5.26                  | .81                    | 3.84                   | 1.30                    |
| Agreeableness          | 6.05                  | .78                    | 4.32                   | 1.16                    |
| Conscientiousness      | 6.42                  | .61                    | 5.21                   | .79                     |
| <i>Facets</i>          |                       |                        |                        |                         |
| Anxiety                | 1.95                  | .41                    | 3.53                   | 1.39                    |
| Uneven-temperedness    | 2.37                  | 1.17                   | 4.47                   | 1.12                    |
| Skepticism             | 4.00                  | 1.05                   | 3.68                   | 1.46                    |
| Depression             | 1.63                  | .60                    | 3.21                   | 1.27                    |
| Self-esteem            | 6.11                  | .74                    | 3.95                   | 1.18                    |
| Negative Affect        | 2.00                  | .75                    | 4.11                   | 1.52                    |
| Sensation Seeking      | 4.05                  | .41                    | 5.05                   | 1.22                    |
| Sociability            | 6.16                  | .60                    | 6.37                   | .60                     |
| Positive Emotions      | 6.58                  | .61                    | 5.68                   | .48                     |
| Dominance              | 4.68                  | .95                    | 6.16                   | .60                     |
| Activity               | 5.16                  | .83                    | 6.26                   | 1.05                    |
| Curiosity              | 5.74                  | .81                    | 3.68                   | 1.29                    |
| Depth                  | 5.95                  | 1.03                   | 2.84                   | 1.30                    |
| Aesthetics             | 5.05                  | 1.03                   | 3.47                   | 1.47                    |

|                         |      |      |      |      |
|-------------------------|------|------|------|------|
| Openness to Sensations  | 4.63 | .90  | 3.11 | 1.41 |
| Intellectual Efficiency | 6.63 | .68  | 3.37 | 1.54 |
| Nontraditionalism       | 4.26 | .73  | 4.84 | 1.21 |
| Nurturance              | 5.63 | .76  | 4.47 | 1.12 |
| Non-manipulative        | 6.37 | .76  | 3.68 | 1.29 |
| Cooperation             | 6.26 | .73  | 5.21 | 1.13 |
| Modesty                 | 5.37 | 1.01 | 4.68 | 1.11 |
| Achievement             | 6.21 | .71  | 5.16 | 1.30 |
| Cautiousness            | 4.95 | 1.81 | 4.63 | .90  |
| Dependability           | 6.37 | 1.17 | 4.47 | 1.22 |
| Orderliness             | 5.21 | .63  | 5.95 | 1.18 |

---

Note.  $N = 19$ . *Desirability* = Independent raters' ratings of level of desirability. *Observability* = Independent raters' ratings of level of observability of the traits and facets. We used an adaptation of John & Robins (1993) method for scoring the evaluativeness of traits. Specifically, we calculated evaluativeness as the absolute difference between the average expert desirability rating and the midpoint of the scale. Additionally, visibility was based on the observability rating.

**Supplemental Material S4**

We conducted additional meta-analyses on the different types of personality measures. Overall, same patterns of mean differences were observed across personality measures and scales. The largest mean differences were observed in Openness/Intellect domain across measures except for trait adjective measures. Interestingly, self-report means were higher than informant-report means for Agreeableness and Conscientiousness among trait adjective measures (vs. short phrase measures). The sample size for trait adjective measures was rather small thus, further studies with larger sample sizes will be required to confirm the present findings. In general, there was minimal reduction in variability of effect sizes suggesting that our conclusions appear to be robust across different personality measures.

Table S5.

*Meta-analyses of the Big Five traits across commonly used measures.*

| Measure and Trait   | k  | N     | Mean Differences |                 |              |                 | Variability Ratios |                 |
|---------------------|----|-------|------------------|-----------------|--------------|-----------------|--------------------|-----------------|
|                     |    |       | d                | SD <sub>d</sub> | δ            | SD <sub>δ</sub> | U                  | SD <sub>U</sub> |
| Trait Adjectives    |    |       |                  |                 |              |                 |                    |                 |
| Emotional Stability | 34 | 7,756 | -.079            | .254            | <b>-.091</b> | .198            | <b>.982</b>        | .115            |
| Extraversion        | 37 | 8,502 | -.112            | .271            | <b>-.130</b> | .228            | <b>1.007</b>       | .108            |
| Openness/Intellect  | 14 | 2,134 | .004             | .267            | <b>.005</b>  | .163            | <b>.930</b>        | .118            |
| Agreeableness       | 17 | 2,613 | .110             | .218            | <b>.132</b>  | .000            | <b>.858</b>        | .176            |
| Conscientiousness   | 17 | 2,168 | .102             | .256            | <b>.123</b>  | .062            | <b>.852</b>        | .079            |



## Short Phrases

|                     |     |        |       |      |              |      |              |      |
|---------------------|-----|--------|-------|------|--------------|------|--------------|------|
| Emotional Stability | 105 | 23,831 | -.130 | .218 | <b>-.150</b> | .127 | <b>1.043</b> | .209 |
| Extraversion        | 99  | 23,477 | -.096 | .177 | <b>-.111</b> | .000 | <b>1.005</b> | .201 |
| Openness/Intellect  | 92  | 22,506 | .222  | .236 | <b>.266</b>  | .179 | <b>1.022</b> | .189 |
| Agreeableness       | 90  | 21,748 | -.050 | .244 | <b>-.059</b> | .194 | <b>.932</b>  | .202 |
| Conscientiousness   | 97  | 22,656 | -.128 | .253 | <b>-.154</b> | .208 | <b>.941</b>  | .188 |

## BFI scales

|                     |    |        |       |      |              |      |              |      |
|---------------------|----|--------|-------|------|--------------|------|--------------|------|
| Emotional Stability | 42 | 9,955  | -.151 | .269 | <b>-.174</b> | .227 | <b>1.000</b> | .183 |
| Extraversion        | 43 | 10,069 | -.162 | .191 | <b>-.188</b> | .054 | <b>1.001</b> | .204 |
| Openness/Intellect  | 40 | 9,661  | .133  | .274 | <b>.159</b>  | .245 | <b>.951</b>  | .075 |
| Agreeableness       | 42 | 9,853  | -.056 | .280 | <b>-.067</b> | .251 | <b>.901</b>  | .189 |
| Conscientiousness   | 49 | 9,892  | -.138 | .311 | <b>-.167</b> | .294 | <b>.921</b>  | .201 |

## NEO scales

|                     |    |       |       |      |              |      |              |      |
|---------------------|----|-------|-------|------|--------------|------|--------------|------|
| Emotional Stability | 32 | 6,993 | -.121 | .197 | <b>-.141</b> | .053 | <b>1.079</b> | .215 |
| Extraversion        | 31 | 7,200 | -.035 | .145 | <b>-.041</b> | .000 | <b>1.048</b> | .238 |
| Openness/Intellect  | 30 | 7,067 | .336  | .141 | <b>.402</b>  | .000 | <b>1.160</b> | .254 |
| Agreeableness       | 28 | 6,531 | -.020 | .216 | <b>-.023</b> | .132 | <b>.977</b>  | .260 |
| Conscientiousness   | 29 | 6,951 | -.166 | .200 | <b>-.201</b> | .096 | <b>.967</b>  | .211 |

Note. Trait Adjectives = 4 unipolar trait adjectives (Trierweiler, Eid, & Lischetzke, 2002), 30 unipolar trait adjectives (Ostendorf, 1990); Short Phrases= Big Five Inventory (John & Srivastava, 1999); BFI scales = BFI-44, BFI-10; NEO scales = NEO FFI, NEO-PI-R, NEO-3 scales.
